# Supplementary material
Source: publisher site journal article supplement (https://www.dovepress.com/get_supplementary_file.php?f=400944.xlsx)
Supplement: Supplementary file 1 [file get_supplementary_file.php]

## Sheet: Table S1
	Supplementary Table S1: Clinical information of participants
		Disease	Age (years)	Sex	Number of past psychiatric admission	Duration of disease (year, month)	Comorbidities	Drugs (daily dose)
	1	schizophrenia	18	F	1	3 y		aripiprazole 24 mg, alprazolam 0.8 mg, suvorexant 15 mg
	2	schizophrenia	21	M	1	1 y 5 m		brexpiprazole 1 mg, brotizolam 0.25 mg
	3	schizophrenia	26	M	8	7 y		aripiprazole 30 mg, levomepromazine 130 mg, mirtazapine 30 mg, sertraline 100 mg, trazodone 100 mg, flunitrazepam 2 mg, lorazepam 1 mg, suvorexant 15 mg, sodium valproate 1200 mg
	4	schizophrenia	30	F	9	12 y	history of drug-induced epilepsy	clozapine 200 mg, brotizolam 0.25 mg, lacosamide 200 mg
	5	schizophrenia	35	F	7	15 y		clozapine 150 mg, sodium valproate 800 mg
	6	schizophrenia	37	F	1	2 y		aripiprazole 9 mg, quetiapine 200 mg, suvorexant 20 mg
	7	schizophrenia	38	F	4	6m	IDD	olanzapine 2.5 mg, paroxetine 12.5 mg, etizolam 0.5 mg, suvorexant 15 mg
	8	schizophrenia	39	F	25	24 y	dyslipidemia	paliperidone 9 mg, levomepromazine 15 mg, diazepam 10 mg, eszopiclone 3 mg, rilmazafone 2 mg, suvorexant 15 mg, gabapentin 600 mg
	9	schizophrenia	43	M	5	11 y 10 m	OSAS, diabetes	blonanserin 8 mg, levomepromazine 15 mg, lorazepam 3 mg, triazolam 0.5 mg, eszopiclone 1 mg
	10	schizophrenia	44	F	6	5 y		risperidone 4 mg, amitriptyline 20 mg, flunitrazepam 1 mg, clonazepam 1 mg
	11	schizophrenia	47	F	2	3 y		quetiapine 500 mg, eszopiclone 1 mg
	12	schizophrenia	48	F	79	16 y		olanzapine 20 mg, flunitrazepam 2 mg, suvorexant 20 mg
	13	schizophrenia	49	M	0	19 y	OSAS	aripiprazole 6 mg, chlorpromazine 200 mg, diazepam 15 mg, suvorexant 20 mg, sodium valproate 1000 mg
	14	schizophrenia	51	M	2	15 y		paliperidone 12 mg, flunitrazepam 2 mg, nitrazepam 5 mg, suvorexant 20 mg
	15	schizophrenia	54	F	1	5 y		quetiapine 500 mg, levomepromazine 50 mg, sertraline 100 mg, flunitrazepam 1 mg, suvorexant 1 mg
	16	schizophrenia	56	F	134	25 y		paliperidone 9 mg, trazodone 75 mg, flunitrazepam 2 mg
	17	schizophrenia	57	M	0	31 y	OSAS, diabetes, hypertension	risperidone 4 mg
	18	schizophrenia	60	F	5	41 y	OSAS, dyslipidemia, diabetes	aripiprazole 12 mg, escialopram 10 mg, brotizolam 0.125 mg, zolpidem 10 mg
	19	depressive disorder	31	M	0	7 y	OSAS	sertraline 75 mg, trazodone 50 mg, zolpidem 10 mg
	20	depressive disorder	36	F	1	9 y		quetiapine 125 mg, sertraline 100 mg, trazodone 50 mg, flunitrazepam 2 mg, triazolam 0.5 mg
	21	depressive disorder	36	M	3	6 y	IBS	olanzapine 5 mg, escitalopram 10 mg, trazodone 50 mg, zolpidem 5 mg, lithium carbonate 900 mg
	22	depressive disorder	41	F	0	14 y	PTSD	aripiprazole 3 mg, duloxetine 40 mg, trazodone 100 mg, eszopiclone 2 mg
	23	depressive disorder	44	F	0	10 y	SLE	duloxetine 40 mg, mirtazapine 15 mg, flunitrazepam 2 mg, lemvorexant 10 mg
	24	depressive disorder	47	M	0	1 y 10 m	hypertension	venlafaxine 150 mg, brotizolam 0.25 mg, suvorexant 20 mg
	25	depressive disorder	51	F	0	4 y		chlorpromazine 25 mg, duloxetine 60 mg, flunitrazepam 1 mg, brotizolam 0.25 mg, sodium valproate 600 mg
	26	depressive disorder	52	M	1	20 y		duloxetine 40 mg, bromazepam 6 mg, flunitrazepam 1.5 mg, suvorexant 20 mg, lamotrigine 100 mg
	27	depressive disorder	62	F	0	1 y	gastric cancer	vortioxetine 10 mg, brotizolam 0.25 mg, suvorexant 20 mg
	28	depressive disorder	63	F	3	1 y 4 m	MDS	mirtazapine 15 mg, trazodone 50 mg
	29	depressive disorder	67	M	1	12 y	history of cerebral infarction	quetiapine 125 mg, venlafaxine 150 mg, trazodone 100 mg, flunitrazepam 1.5 mg, carbamazepine 200 mg
	30	depressive disorder	68	F	1	1 y		chlorpromazine 12.5 mg, maprotiline 75 mg, trazodone 75 mg, zolpidem 10 mg, nitrazepam 10 mg
	31	depressive disorder	71	F	0	3m		olanzapine 5 mg, escitalopram 15 mg, trazodone 25 mg
	32	depressive disorder	72	M	0	5m	history of cerebral infarction, hypertension	venlafaxine 37.5 mg, zolpidem 5 mg
	33	depressive disorder	73	M	1	7 y	atrial fibrillation, diabetes	aripiprazole 3 mg, escitalopram 15 mg, suvorexant 15 mg
	34	depressive disorder	75	F	0	5m		aripiprazole 3 mg, duloxetine 60 mg
	35	depressive disorder	75	M	0	49 y	OSAS, atrial fibrillation, history of cerebral infarction	trazodone 50 mg,ramelteon 8 mg, suvolexant 15 mg
	36	depressive disorder	80	F	1	5m	hypertension	duloxetine 40 mg, eszopiclone 1 mg
	37	depressive disorder	83	F	0	7 y	diabetes, hypertension	venlafaxine 75 mg,eszopiclone 2 mg
	38	bipolar disorder	24	F	0	4 y		risperidone 1 mg, flunitrazepam 2 mg, ramelteon 8 mg, lithium carbonate 600 mg, gabapentin600 mg
	39	bipolar disorder	38	F	10	19 y	OSAS	aripiprazole once-monthly 400 mg, quetiapine 25 mg, sertraline 100 mg, clotiazepam 30 mg
	40	bipolar disorder	51	F	0	16 y		aripiprazole 18 mg, quetiapine 75 mg, flunitrazepam 1 mg, triazolam 0.25 mg, lithium carbonate 800 mg
	41	chronic insomnia	49	F	2	3 y		chlorpromazine 50 mg, mirtazapine 30 mg, clonazepam 2 mg, trazodone 100 mg, flunitrazepam 1 mg, zolpidem 10 mg
	42	chronic insomnia	60	M	0	2 y	chronic pancreatitis	quetiapine 25 mg, brotizolam 0.25 mg, flunitrazepam 2 mg, ramelteon 8 mg
	43	chronic insomnia	78	F	0	3 y		olanzapine 2.5 mg, mirtazapine 40 mg, bromazepam 6 mg, zolpidem 10 mg
	44	narcolepsy, type 1	27	M	0	5 m	OSAS	drug free
	45	idiopathic hypersomnia	16	F	0	1 y		drug free
	46	idiopathic hypersomnia	24	M	0	unknown	diabetes	drug free
	47	idiopathic hypersomnia	30	M	0	8 m		drug free
	48	idiopathic hypersomnia	38	F	0	10 y		drug free
	49	idiopathic hypersomnia	43	M	0	4 m		drug free
	50	OSAS	51	M	0	unknown	diabetes, obsessive-compulsive disorder	sulpiride 100 mg, sertraline 25 mg, flunitrazepam 3 mg, zolpidem 10 mg
	51	OSAS	64	F	0	unknown		drug free
	52	DSPD	29	F	0	3 m		drug free
	Notes: Participants 12 and 16 were repeatedly treated with maintenance electroconvulsive therapy for schizophrenia, resulting in a high number of hospitalizations.
	Abbreviations: IDD, intellectual developmental disorder; OSAS, obstructive sleep apnea syndrome; IBS, irritable bowel syndrome; PTSD, post traumatic stress disorder; SLE, systemic lupus erythematous; MDS, myelodysplastic syndromes, DSPD, delayed sleep-wake phase disorder.

## Sheet: Table S2
	Supplementary Table S2: Sleep-Wake Summary Agreement (Expanded Results)
	Outcome	Device	n	Device Mean (SD)	Reference Mean (SD)	CI Type	CI Level	Proportional Bias	Log Transform	Normality	Heterosce-dasticity	Bias (SD)	Bias CI	LOA Lower	LOA Lower CI	LOA Upper	LOA Upper CI
	TST	Sleepgraph	46	452.52 (81.95)	453.18 (82.02)	boot	0.95	FALSE	FALSE	FALSE	FALSE	-0.66 (34.42)	[-10.27, 9.36]	-68.11	[-77.86, -57.64]	66.8	[57.27, 76.82]
	TST	Fitbit Sense	45	491.9 (40.47)	456.19 (83.16)	boot	0.95	TRUE	FALSE	FALSE	TRUE	352.88 + -0.7 x ref	b0 = [276.18, 423.43], b1 = [-0.85, -0.52]	bias - 2.46(-4.63 + 0.06 x ref)	c0 = [-67.11, 0.25], c1 = [0.05, 0.2]	bias + 2.46(-4.63 + 0.06 x ref)	c0 = [-67.11, 0.25], c1 = [0.05, 0.2]
	TST	MTN-220/221	44	481.5 (78.78)	449.56 (80.74)	boot	0.95	TRUE	FALSE	TRUE	TRUE	185.44 + -0.34 x ref	b0 = [68.61, 286.94], b1 = [-0.55, -0.09]	bias - 2.46(108.01 + -0.15 x ref)	c0 = [104.88, 243.8], c1 = [-0.45, -0.14]	bias + 2.46(108.01 + -0.15 x ref)	c0 = [104.88, 243.8], c1 = [-0.45, -0.14]
	SE	Sleepgraph	46	81.7 (13.28)	81.71 (12.5)	boot	0.95	FALSE	FALSE	FALSE	TRUE	-0.01 (5.71)	[-1.61, 1.71]	bias - 2.46(9.7 + -0.08 x ref)	c0 = [6.55, 24.44], c1 = [-0.26, -0.04]	bias + 2.46(9.7 + -0.08 x ref)	c0 = [6.55, 24.44], c1 = [-0.26, -0.04]
	SE	Fitbit Sense	45	88.54 (4.44)	82.04 (13.31)	boot	0.95	TRUE	FALSE	FALSE	TRUE	75.77 + -0.84 x ref	b0 = [67.11, 85.11], b1 = [-0.96, -0.74]	bias - 2.46(5.49 + -0.03 x ref)	c0 = [3.21, 12.05], c1 = [-0.11, 0]	bias + 2.46(5.49 + -0.03 x ref)	c0 = [3.21, 12.05], c1 = [-0.11, 0]
	SE	MTN-220/221	44	86.53 (12.74)	80.78 (12.87)	boot	0.95	TRUE	FALSE	FALSE	TRUE	39.53 + -0.42 x ref	b0 = [13.95, 60.38], b1 = [-0.66, -0.12]	bias - reference x 0.3	bias - reference x [0.21, 0.4]	bias + reference x 0.3	bias + reference x [0.21, 0.4]
	SL	Sleepgraph	46	26.98 (33.97)	26.03 (40.11)	boot	0.95	FALSE	FALSE	FALSE	TRUE	0.94 (23.93)	[-5.6, 8.29]	bias - 2.46(7.29 + 0.22 x ref)	c0 = [-0.81, 5.44], c1 = [0.28, 0.54]	bias + 2.46(7.29 + 0.22 x ref)	c0 = [-0.81, 5.44], c1 = [0.28, 0.54]
	SL	Fitbit Sense	45	10.07 (11.98)	27.99 (39.04)	boot	0.95	TRUE	FALSE	FALSE	FALSE	9.65 + -0.99 x ref	b0 = [4.94, 13.49], b1 = [-1.04, -0.88]	bias - 23.46	bias - [17.43, 30.92]	bias + 23.46	bias + [17.43, 30.92]
	SL	MTN-220/221	44	3.91 (6.31)	29.73 (41.85)	classic	0.95	TRUE	FALSE	FALSE	FALSE	4.17 + -1.01 x ref	b0 = [1.78, 6.55], b1 = [-1.06, -0.96]	bias - 12.35	bias - [7.25, 18.42]	bias + 12.35	bias + [7.25, 18.42]
	WASO	Sleepgraph	46	73.91 (66.93)	74.38 (64.82)	boot	0.95	FALSE	FALSE	FALSE	TRUE	-0.47 (19.76)	[-6.39, 4.94]	bias - 2.46(7.09 + 0.08 x ref)	c0 = [-3.22, 6.92], c1 = [0.08, 0.22]	bias + 2.46(7.09 + 0.08 x ref)	c0 = [-3.22, 6.92], c1 = [0.08, 0.22]
	WASO	Fitbit Sense	45	54.17 (25.99)	73.21 (70.87)	boot	0.95	TRUE	FALSE	FALSE	TRUE	43.72 + -0.86 x ref	b0 = [32.98, 53.94], b1 = [-0.99, -0.71]	bias - 2.46(14.95 + 0.05 x ref)	c0 = [6.9, 16.01], c1 = [0.03, 0.16]	bias + 2.46(14.95 + 0.05 x ref)	c0 = [6.9, 16.01], c1 = [0.03, 0.16]
	WASO	MTN-220/221	44	70.65 (67.72)	76.77 (67.05)	classic	0.95	TRUE	FALSE	FALSE	TRUE	16.85 + -0.3 x ref	b0 = [-6.13, 39.82], b1 = [-0.53, -0.07]	bias - reference x 1.99	bias - reference x [1.95, 2]	bias + reference x 1.99	bias + reference x [1.95, 2]
	REML	Sleepgraph	46	145.58 (88.36)	168.18 (90.2)	boot	0.95	TRUE	FALSE	FALSE	TRUE	61.76 + -0.5 x ref	b0 = [7.33, 106.49], b1 = [-0.78, -0.16]	bias - 2.46(20.58 + 0.21 x ref)	c0 = [-42.93, 13.9], c1 = [0.25, 0.59]	bias + 2.46(20.58 + 0.21 x ref)	c0 = [-42.93, 13.9], c1 = [0.25, 0.59]
	REML	Fitbit Sense	45	168.88 (85.89)	188.08 (92.83)	boot	0.95	TRUE	FALSE	TRUE	TRUE	177.33 + -1.04 x ref	b0 = [121.52, 224.91], b1 = [-1.25, -0.8]	bias - 2.46(85.94 + -0.09 x ref)	c0 = [71.94, 135.45], c1 = [-0.36, -0.02]	bias + 2.46(85.94 + -0.09 x ref)	c0 = [71.94, 135.45], c1 = [-0.36, -0.02]
	Notes: Sleep-wake summary agreement between devices and reference. True/false outputs for proportional bias, normality, and heteroscedasticity columns indicate statistical significance at p<0.05. Bias is the mean difference between the device and reference. Regression equations are returned for bias and LOAs when proportional bias or heteroscesticity are significant, respectively. b1 is the slope…
	Abbreviations: CI, confidence interval; LOA, limits of agreement; SD, standard deviation; SE, sleep efficiency; SL, sleep latency; TST, total sleep time; WASO, wake after sleep onset.

## Sheet: Table S3
	Supplementary Table S3: Sleep Stage Summary Agreement (Expanded Results)
	Stage	Device	n	Device Mean (SD)	Reference Mean (SD)	CI Type	CI Level	Proportional Bias	Log Transform	Normality	Heterosce-dasticity	Bias (SD)	Bias CI	LOA Lower	LOA Lower CI	LOA Upper	LOA Upper CI
	Light	Sleepgraph	46	274.71 (50.99)	294.56 (62.87)	boot	0.95	TRUE	FALSE	TRUE	FALSE	90.42 + -0.37 x ref	b0 = [42.82, 138.27], b1 = [-0.54, -0.22]	bias - 63.6	bias - [55.56, 76.05]	bias + 63.6	bias + [55.56, 76.05]
	Light	Fitbit Sense	45	317.44 (55.14)	299.2 (58.22)	boot	0.95	TRUE	FALSE	TRUE	FALSE	322.04 + -1.02 x ref	b0 = [233.78, 402.96], b1 = [-1.28, -0.72]	bias - 108.06	bias - [94.3, 127.96]	bias + 108.06	bias + [94.3, 127.96]
	Deep	Sleepgraph	46	77.06 (46.21)	86.13 (43.43)	boot	0.95	TRUE	FALSE	FALSE	TRUE	11.02 + -0.23 x ref	b0 = [-6.7, 26.05], b1 = [-0.42, -0.06]	bias - 2.46(11.56 + 0.11 x ref)	c0 = [-12.68, 16.09], c1 = [0.06, 0.4]	bias + 2.46(11.56 + 0.11 x ref)	c0 = [-12.68, 16.09], c1 = [0.06, 0.4]
	Deep	Fitbit Sense	45	73 (33.82)	88.12 (43.85)	boot	0.95	TRUE	FALSE	FALSE	TRUE	45.9 + -0.69 x ref	b0 = [24.41, 65.52], b1 = [-0.93, -0.44]	bias - 2.46(11.17 + 0.15 x ref)	c0 = [-13.77, 9.92], c1 = [0.16, 0.43]	bias + 2.46(11.17 + 0.15 x ref)	c0 = [-13.77, 9.92], c1 = [0.16, 0.43]
	REM	Sleepgraph	46	100.76 (51.04)	72.84 (42)	boot	0.95	FALSE	FALSE	FALSE	TRUE	27.91 (35.84)	[16.96, 37.43]	bias - 2.46(36.44 + -0.14 x ref)	c0 = [34.46, 58.95], c1 = [-0.45, -0.11]	bias + 2.46(36.44 + -0.14 x ref)	c0 = [34.46, 58.95], c1 = [-0.45, -0.11]
	REM	Fitbit Sense	45	101.46 (42.76)	71.38 (40.56)	boot	0.95	TRUE	FALSE	FALSE	FALSE	72.72 + -0.6 x ref	b0 = [47.17, 96.61], b1 = [-0.89, -0.28]	bias - reference x 1.98	bias - reference x [1.97, 2.85]	bias + reference x 1.98	bias + reference x [1.97, 2.85]
	Notes: Sleep stage summary agreement between devices and PSG reference. Results are shown for all devices that output sleep stage classifications. See Supplementary Table S1 notes for additional table details.
	Abbreviations: CI, confidence interval; LOA, limits of agreement; REM, rapid eye movement; SD, standard deviation.
